# Supplementary material for: Application of GIS and Remote Sensing to Identify Changes in Surface Water Bodies and Wetland Depletion in the Kumasi Metropolis, Ghana.
Source: Preprints.org preprint supplement (doi:10.20944/preprints202304.0159.v1), 2023-04-10
Supplement: Supplementary file 1 [file GPS.xlsx]

## Sheet: Sheet1
Land use Class	Latitude(degree)	Longitude(degree)
Built up	6.66562	-1.64038
Built up	6.66257	-1.61549
Built up	6.69166	-1.66198
Built up	6.68543	-1.60394
Built up	6.72942	-1.61232
Built up	6.75119	-1.6109
Built up	6.72137	-1.56304
Built up	6.70132	-1.71358
Built up	6.7093	-1.69279
Built up	6.70018	-1.72572
Built up	6.65412	-1.53563
Agricula Lands	6.64394	-1.52091
Agricula Lands	6.64435	-1.5253
Agricula Lands	6.71594	-1.54901
Agricula Lands	6.68272	-1.5643
Agricula Lands	6.71462	-1.549
Agricula Lands	6.73666	-1.68054
Agricula Lands	6.73797	-1.67193
Agricula Lands	6.73772	-1.66781
Agricula Lands	6.67732	-1.67477
Agricula Lands	6.69156	-1.6974
Agricula Lands	6.67268	-1.71671
Wetlands	6.7415	-1.68872
Wetlands	6.74059	-1.68297
Wetlands	6.73591	-1.69149
Wetlands	6.64469	-1.61252
Wetlands	6.6591	-1.61094
Wetlands	6.69829	-1.56077
Wetlands	6.63075	-1.60551
Wetlands	6.61932	-1.60048
Wetlands	6.61839	-1.58871
Wetlands	6.62557	-1.57569
Wetlands	6.63159	-1.56976
Wetlands	6.63522	-1.56261
